# Supplementary material
Source: PubMed Central journal article supplement (PMC3366043)
Supplement: NIHMS356254-supplement-Supp_Table_S1.pdf [file NIHMS356254-supplement-Supp_Table_S1.pdf]

Supplemental Table 1. Cohort origins and demographics\*

|                  | Discovery Cohort |                 |       | Replication Cohort |                |     |                |               |               |              |                 |                 |     |                | Total          |      |
|------------------|------------------|-----------------|-------|--------------------|----------------|-----|----------------|---------------|---------------|--------------|-----------------|-----------------|-----|----------------|----------------|------|
|                  |                  |                 | Total | Germany            |                |     | Texas          |               | Delaware      |              | UK              |                 |     | Utah           |                |      |
|                  | F                | M               |       | F                  | M              | Unk | F              | M             | F             | M            | F               | M               | Unk | F              |                | M    |
| Oligo-articular  | 370<br>(80.3%)   | 91<br>(19.7%)   | 461   | 280<br>(76.1%)     | 88<br>(23.9%)  | 21  | 60<br>(87.0%)  | 9 (13.0%)     | 15<br>(88.2%) | 2<br>(11.8%) | 352<br>(71.3%)  | 142<br>(28.7%)  | 17  | 131<br>(69.3%) | 58<br>(30.7%)  | 1175 |
| Poly RFneg       | 277<br>(78.5%)   | 76<br>(21.5%)   | 353   | 93<br>(66.9%)      | 46<br>(33.1%)  | 3   | 63<br>(80.7%)  | 15<br>(19.2%) | 7<br>(100%)   | 0<br>(0%)    | 188<br>(79.3%)  | 49<br>(20.7%)   | 7   | 78<br>(79.6%)  | 20<br>(20.4%)  | 569  |
| Total Cases      | 647<br>(79.5%)   | 167<br>(20.5%)  | 814   | 373<br>(73.6%)     | 134<br>(26.4%) | 24  | 123<br>(83.7%) | 24<br>(16.3%) | 22<br>(91.7%) | 2<br>(8.3%)  | 540<br>(73.9%)  | 191<br>(26.1%)  | 24  | 209<br>(72.8%) | 78<br>(27.1%)  | 1744 |
| Local Controls   | 336<br>(55.6%)   | 322<br>(48.9%)  | 658   | 237<br>(47.6%)     | 261<br>(52.4%) | 2   | 178<br>(65.0%) | 96<br>(35.0%) |               |              | 2647<br>(48.2%) | 2733<br>(50.8%) |     | 511<br>(59.7%) | 345<br>(40.3%) | 7010 |
| nonGAIN Controls | 986<br>(41.1%)   | 1414<br>(58.9%) | 2400  |                    |                |     |                |               |               |              |                 |                 |     |                |                |      |

\*M = male; F = female; Unk=unknown; Poly RFneg = Rheumatoid Factor negative Polyarticular JIA; For the UK cohort, the controls are from Wellcome Trust Case-Control Consortium, For the Discovery cohort the out-of-study controls include Molecular Genetics of Schizophrenia non-GAIN Samples.
