# Supplementary material
Source: PubMed Central journal article supplement (PMC3366043)
Supplement: NIHMS356254-supplement-Supp_Table_S2.pdf [file NIHMS356254-supplement-Supp_Table_S2.pdf]

Supplemental Table 2. Top 200 Association findings in the Discovery Cohort ordered by location.

| SNP        | Chr | Mb     | Nearest Gene<br>(within 200<br>kb) | N   |      | Genotype Frequencies |                | Minor Allele<br>Frequencies |      | P-value  | Model | OR   | 95% CI    |
|------------|-----|--------|------------------------------------|-----|------|----------------------|----------------|-----------------------------|------|----------|-------|------|-----------|
|            |     |        |                                    | JIA | Ctrl | Cases                | Controls       | JIA                         | Ctrl |          |       |      |           |
| rs215792   | 1   | 37.38  | GRIK3                              | 811 | 3057 | 0.32/0.52/0.16       | 0.39/0.46/0.15 | 0.42                        | 0.38 | 1.72E-04 | dom   | 1.37 | 1.16-1.62 |
| rs1288632  | 1   | 53.7   | DMRTB1                             | 814 | 3058 | 0.48/0.42/0.1        | 0.55/0.39/0.07 | 0.31                        | 0.26 | 5.71E-05 | add   | 1.28 | 1.14-1.44 |
| rs1108989  | 1   | 53.7   | DMRTB1                             | 814 | 3058 | 0.48/0.42/0.1        | 0.55/0.39/0.07 | 0.31                        | 0.26 | 6.69E-05 | add   | 1.28 | 1.13-1.44 |
| rs3811438  | 1   | 79.18  | ELTD1                              | 813 | 3058 | 0.8/0.19/0           | 0.86/0.14/0    | 0.10                        | 0.07 | 1.68E-04 | dom   | 1.47 | 1.2-1.79  |
| rs12029928 | 1   | 79.21  | ELTD1                              | 814 | 3053 | 0.8/0.2/0            | 0.86/0.14/0    | 0.10                        | 0.07 | 1.20E-04 | add   | 1.46 | 1.2-1.77  |
| rs1230666  | 1   | 113.97 | MAGI3                              | 814 | 3053 | 0.67/0.29/0.04       | 0.74/0.24/0.02 | 0.18                        | 0.14 | 1.95E-06 | add   | 1.42 | 1.23-1.65 |
| rs6679677  | 1   | 114.11 | RSBN1                              | 814 | 3055 | 0.75/0.22/0.03       | 0.81/0.18/0.01 | 0.14                        | 0.10 | 1.07E-06 | add   | 1.5  | 1.28-1.77 |
| rs10776775 | 1   | 114.24 | AP4B1                              | 814 | 3058 | 0.36/0.47/0.17       | 0.42/0.45/0.13 | 0.41                        | 0.35 | 2.73E-05 | add   | 1.27 | 1.14-1.42 |
| rs10776801 | 1   | 115.68 | NGFB                               | 793 | 3027 | 0.83/0.17/0.01       | 0.89/0.11/0    | 0.09                        | 0.06 | 4.76E-06 | add   | 1.63 | 1.32-2.01 |
| rs7511950  | 1   | 185.32 | PLA2G4A                            | 813 | 3058 | 0.57/0.37/0.06       | 0.65/0.31/0.05 | 0.24                        | 0.20 | 7.96E-05 | dom   | 1.37 | 1.17-1.61 |
| rs1009221  | 2   | 26.75  | KCNK3                              | 809 | 3052 | 0.25/0.55/0.2        | 0.26/0.49/0.26 | 0.47                        | 0.50 | 1.81E-04 | rec   | 0.69 | 0.57-0.84 |
| rs13427136 | 2   | 39.76  | TMEM178                            | 814 | 3058 | 0.83/0.17/0          | 0.88/0.12/0.01 | 0.09                        | 0.07 | 1.63E-04 | dom   | 1.5  | 1.22-1.85 |
| rs11690012 | 2   | 43.4   | THADA                              | 814 | 3058 | 0.54/0.41/0.05       | 0.62/0.33/0.05 | 0.26                        | 0.22 | 5.90E-05 | dom   | 1.38 | 1.18-1.61 |
| rs2118480  | 2   | 60.74  | PAPOLG                             | 808 | 3048 | 0.38/0.46/0.15       | 0.44/0.46/0.1  | 0.38                        | 0.33 | 1.50E-04 | add   | 1.25 | 1.11-1.4  |
| rs268132   | 2   | 65.46  | SPRED2                             | 780 | 2958 | 0.32/0.51/0.17       | 0.26/0.52/0.22 | 0.43                        | 0.48 | 1.12E-04 | add   | 0.8  | 0.71-0.89 |
| rs10210235 | 2   | 71.04  | ATP6V1B1                           | 811 | 3056 | 0.29/0.54/0.17       | 0.28/0.49/0.23 | 0.44                        | 0.48 | 8.57E-05 | rec   | 0.67 | 0.54-0.82 |
| rs12987484 | 2   | 105.73 | NCK2                               | 811 | 3055 | 0.51/0.42/0.07       | 0.45/0.45/0.1  | 0.28                        | 0.33 | 1.17E-04 | add   | 0.79 | 0.69-0.89 |
| rs260705   | 2   | 108.94 | EDAR                               | 797 | 2964 | 0.78/0.2/0.02        | 0.71/0.26/0.04 | 0.12                        | 0.16 | 8.04E-06 | add   | 0.69 | 0.59-0.81 |
| rs13019180 | 2   | 116.2  | DPP10                              | 814 | 3058 | 0.56/0.36/0.08       | 0.48/0.43/0.09 | 0.26                        | 0.30 | 7.54E-05 | dom   | 0.73 | 0.62-0.85 |
| rs13033400 | 2   | 116.2  | DPP10                              | 812 | 3057 | 0.56/0.36/0.08       | 0.48/0.43/0.09 | 0.26                        | 0.30 | 7.76E-05 | dom   | 0.73 | 0.63-0.85 |
| rs1374271  | 2   | 116.25 | DPP10                              | 813 | 3057 | 0.58/0.35/0.08       | 0.5/0.42/0.08  | 0.25                        | 0.29 | 1.15E-04 | dom   | 0.74 | 0.63-0.86 |
| rs997033   | 2   | 146.39 |                                    | 813 | 3057 | 0.44/0.43/0.13       | 0.37/0.48/0.15 | 0.34                        | 0.39 | 8.60E-05 | dom   | 0.73 | 0.62-0.85 |
| rs4533492  | 2   | 150.6  |                                    | 813 | 3052 | 0.4/0.43/0.17        | 0.32/0.51/0.17 | 0.39                        | 0.42 | 1.20E-04 | dom   | 0.73 | 0.62-0.86 |
| rs330646   | 2   | 150.61 |                                    | 813 | 3049 | 0.27/0.45/0.28       | 0.26/0.52/0.22 | 0.51                        | 0.48 | 8.71E-05 | rec   | 1.42 | 1.19-1.7  |
| rs330625   | 2   | 150.62 |                                    | 813 | 3057 | 0.37/0.44/0.2        | 0.29/0.51/0.19 | 0.41                        | 0.45 | 3.13E-05 | dom   | 0.71 | 0.6-0.83  |
| rs108136   | 2   | 150.62 |                                    | 814 | 3056 | 0.26/0.45/0.29       | 0.25/0.52/0.23 | 0.51                        | 0.49 | 1.49E-04 | rec   | 1.4  | 1.18-1.66 |
| rs330624   | 2   | 150.62 |                                    | 810 | 3051 | 0.27/0.45/0.28       | 0.26/0.52/0.22 | 0.51                        | 0.48 | 1.54E-04 | rec   | 1.41 | 1.18-1.68 |

|            |   |        |              |     |      |                |                |      |      |          |     |      |           |
|------------|---|--------|--------------|-----|------|----------------|----------------|------|------|----------|-----|------|-----------|
| rs10931480 | 2 | 191.95 |              | 812 | 3056 | 0.73/0.25/0.02 | 0.67/0.3/0.04  | 0.15 | 0.19 | 1.88E-04 | add | 0.75 | 0.64-0.87 |
| rs12466358 | 2 | 233.11 | CHRND        | 812 | 3048 | 0.48/0.44/0.09 | 0.56/0.37/0.07 | 0.31 | 0.25 | 1.03E-05 | dom | 1.42 | 1.21-1.66 |
| rs11894280 | 2 | 238.17 | RAB17        | 814 | 3057 | 0.8/0.19/0     | 0.86/0.13/0.01 | 0.10 | 0.07 | 1.81E-05 | dom | 1.55 | 1.27-1.9  |
| rs12464181 | 2 | 238.19 | LRRFIP1      | 813 | 3053 | 0.78/0.21/0    | 0.85/0.14/0.01 | 0.11 | 0.08 | 2.57E-05 | dom | 1.52 | 1.25-1.84 |
| rs12464145 | 2 | 238.19 | LRRFIP1      | 814 | 3057 | 0.81/0.18/0    | 0.87/0.13/0    | 0.09 | 0.07 | 1.39E-04 | dom | 1.49 | 1.21-1.83 |
| rs4663779  | 2 | 238.24 | LRRFIP1      | 813 | 3048 | 0.44/0.47/0.09 | 0.52/0.4/0.08  | 0.32 | 0.28 | 1.90E-04 | dom | 1.35 | 1.15-1.57 |
| rs1552484  | 3 | 12.56  | LOC100129480 | 814 | 3058 | 0.33/0.45/0.22 | 0.26/0.51/0.22 | 0.44 | 0.48 | 1.34E-04 | dom | 0.72 | 0.61-0.85 |
| rs2596822  | 3 | 12.57  | MKRN2        | 812 | 3057 | 0.31/0.45/0.24 | 0.24/0.51/0.24 | 0.46 | 0.50 | 9.26E-05 | dom | 0.71 | 0.6-0.84  |
| rs2454422  | 3 | 12.58  | MKRN2        | 814 | 3055 | 0.31/0.46/0.23 | 0.24/0.51/0.24 | 0.46 | 0.50 | 6.22E-05 | dom | 0.71 | 0.6-0.84  |
| rs1532533  | 3 | 12.61  | RAF1         | 813 | 3058 | 0.3/0.46/0.24  | 0.31/0.51/0.18 | 0.47 | 0.44 | 8.55E-05 | rec | 1.45 | 1.2-1.75  |
| rs6781484  | 3 | 33.52  | CLASP2       | 801 | 3015 | 0.61/0.34/0.05 | 0.54/0.4/0.07  | 0.22 | 0.26 | 1.05E-04 | add | 0.77 | 0.67-0.88 |
| rs8179967  | 3 | 33.58  | CLASP2       | 812 | 3040 | 0.57/0.37/0.07 | 0.48/0.43/0.09 | 0.25 | 0.30 | 6.04E-05 | add | 0.77 | 0.68-0.88 |
| rs6807542  | 3 | 33.63  | CLASP2       | 812 | 3057 | 0.56/0.37/0.07 | 0.48/0.43/0.09 | 0.26 | 0.31 | 9.56E-05 | dom | 0.73 | 0.63-0.86 |
| rs11707471 | 3 | 46.47  | LTF          | 791 | 2980 | 0.55/0.38/0.07 | 0.49/0.4/0.11  | 0.26 | 0.31 | 1.73E-04 | add | 0.79 | 0.7-0.89  |
| rs771798   | 3 | 103.2  | LOC152225    | 812 | 3036 | 0.56/0.38/0.06 | 0.49/0.43/0.08 | 0.25 | 0.30 | 1.25E-04 | add | 0.78 | 0.69-0.88 |
| rs771795   | 3 | 103.2  | LOC152225    | 813 | 3056 | 0.56/0.38/0.06 | 0.49/0.43/0.08 | 0.25 | 0.30 | 1.45E-04 | add | 0.78 | 0.69-0.89 |
| rs771797   | 3 | 103.2  | LOC152225    | 812 | 3054 | 0.56/0.38/0.06 | 0.49/0.43/0.08 | 0.25 | 0.30 | 1.79E-04 | add | 0.78 | 0.69-0.89 |
| rs4683863  | 3 | 103.22 | LOC152225    | 814 | 3058 | 0.56/0.38/0.06 | 0.49/0.43/0.08 | 0.25 | 0.30 | 1.42E-04 | add | 0.78 | 0.69-0.89 |
| rs3755579  | 3 | 120.7  | KTELC1       | 811 | 3054 | 0.48/0.44/0.09 | 0.55/0.38/0.06 | 0.30 | 0.26 | 1.40E-04 | add | 1.27 | 1.12-1.43 |
| rs4447803  | 3 | 120.72 | C3orf1       | 813 | 3058 | 0.48/0.44/0.09 | 0.55/0.39/0.06 | 0.31 | 0.26 | 9.54E-05 | add | 1.27 | 1.13-1.44 |
| rs4461452  | 3 | 120.72 | C3orf1       | 807 | 3051 | 0.44/0.47/0.1  | 0.52/0.41/0.08 | 0.33 | 0.28 | 9.92E-05 | dom | 1.36 | 1.17-1.6  |
| rs2886059  | 3 | 127.35 | ALDH1L1      | 809 | 3055 | 0.65/0.32/0.03 | 0.72/0.25/0.03 | 0.19 | 0.16 | 1.23E-04 | dom | 1.38 | 1.17-1.63 |
| rs541042   | 3 | 128.97 | MGLL         | 814 | 3057 | 0.69/0.29/0.02 | 0.76/0.23/0.02 | 0.17 | 0.13 | 7.98E-05 | dom | 1.41 | 1.19-1.67 |
| rs838601   | 3 | 144.7  | SLC9A9       | 814 | 3058 | 0.28/0.53/0.19 | 0.35/0.47/0.18 | 0.46 | 0.42 | 7.23E-05 | dom | 1.41 | 1.19-1.68 |
| rs7646910  | 3 | 185.84 | EPHB3        | 813 | 3058 | 0.3/0.54/0.16  | 0.29/0.49/0.22 | 0.43 | 0.46 | 1.15E-04 | rec | 0.66 | 0.54-0.82 |
| rs4686705  | 3 | 185.84 | EPHB3        | 810 | 3049 | 0.3/0.54/0.15  | 0.29/0.49/0.21 | 0.42 | 0.46 | 1.86E-04 | rec | 0.67 | 0.54-0.83 |
| rs1947549  | 4 | 64.16  |              | 812 | 3034 | 0.46/0.44/0.1  | 0.52/0.41/0.07 | 0.32 | 0.28 | 1.57E-04 | add | 1.26 | 1.12-1.42 |
| rs6815080  | 4 | 66.05  | EPHA5        | 792 | 3000 | 0.46/0.46/0.08 | 0.53/0.37/0.09 | 0.31 | 0.28 | 1.60E-04 | dom | 1.35 | 1.16-1.59 |
| rs7690697  | 4 | 81.06  | ANTXR2       | 814 | 3058 | 0.58/0.37/0.05 | 0.65/0.31/0.04 | 0.24 | 0.20 | 1.87E-04 | dom | 1.35 | 1.15-1.58 |
| rs4234847  | 4 | 81.07  | ANTXR2       | 813 | 3057 | 0.62/0.35/0.03 | 0.7/0.27/0.03  | 0.21 | 0.17 | 2.40E-05 | dom | 1.42 | 1.21-1.66 |
| rs10034564 | 4 | 83.12  |              | 813 | 3051 | 0.23/0.55/0.23 | 0.29/0.49/0.21 | 0.50 | 0.46 | 1.63E-04 | dom | 1.42 | 1.18-1.7  |

|            |   |        |           |     |      |                |                |      |      |          |     |      |           |
|------------|---|--------|-----------|-----|------|----------------|----------------|------|------|----------|-----|------|-----------|
| rs12499753 | 4 | 123.33 | ADAD1     | 812 | 3055 | 0.39/0.46/0.15 | 0.45/0.44/0.11 | 0.38 | 0.33 | 6.78E-05 | add | 1.26 | 1.12-1.41 |
| rs17388568 | 4 | 123.33 | ADAD1     | 813 | 3057 | 0.48/0.41/0.11 | 0.54/0.39/0.07 | 0.31 | 0.27 | 1.39E-04 | add | 1.26 | 1.12-1.42 |
| rs11724582 | 4 | 123.61 | IL2       | 809 | 3055 | 0.56/0.39/0.05 | 0.5/0.41/0.09  | 0.24 | 0.29 | 1.73E-04 | add | 0.78 | 0.69-0.89 |
| rs11098659 | 4 | 123.62 | IL2       | 813 | 3057 | 0.4/0.45/0.15  | 0.45/0.44/0.11 | 0.38 | 0.33 | 9.78E-05 | add | 1.25 | 1.12-1.4  |
| rs6829845  | 4 | 123.73 | IL21      | 813 | 3054 | 0.43/0.43/0.15 | 0.49/0.42/0.1  | 0.36 | 0.31 | 2.37E-05 | add | 1.28 | 1.14-1.43 |
| rs925549   | 4 | 123.75 | IL21      | 814 | 3057 | 0.43/0.43/0.14 | 0.49/0.42/0.09 | 0.35 | 0.30 | 1.37E-04 | add | 1.25 | 1.11-1.4  |
| rs2322305  | 4 | 142.88 | IL15      | 812 | 3058 | 0.33/0.46/0.2  | 0.26/0.52/0.22 | 0.43 | 0.48 | 7.13E-05 | dom | 0.71 | 0.6-0.84  |
| rs1602777  | 4 | 142.88 | IL15      | 813 | 3056 | 0.33/0.47/0.2  | 0.26/0.52/0.22 | 0.43 | 0.48 | 1.09E-04 | dom | 0.72 | 0.61-0.85 |
| rs970509   | 4 | 142.9  | IL15      | 811 | 3058 | 0.34/0.46/0.2  | 0.26/0.52/0.22 | 0.43 | 0.48 | 7.24E-05 | dom | 0.71 | 0.6-0.84  |
| rs11724130 | 4 | 150.7  |           | 813 | 3055 | 0.35/0.49/0.16 | 0.29/0.5/0.21  | 0.40 | 0.46 | 1.06E-04 | add | 0.8  | 0.72-0.9  |
| rs1125051  | 4 | 150.78 |           | 814 | 3058 | 0.35/0.49/0.16 | 0.29/0.5/0.21  | 0.40 | 0.46 | 9.96E-05 | add | 0.8  | 0.72-0.9  |
| rs6535695  | 4 | 150.84 |           | 813 | 3058 | 0.36/0.49/0.15 | 0.3/0.5/0.2    | 0.40 | 0.45 | 9.44E-05 | add | 0.8  | 0.71-0.89 |
| rs10520942 | 5 | 28.31  |           | 814 | 3058 | 0.72/0.25/0.03 | 0.78/0.21/0.02 | 0.15 | 0.12 | 1.93E-04 | add | 1.34 | 1.15-1.57 |
| rs283595   | 5 | 73.28  | RGNEF     | 814 | 3058 | 0.34/0.43/0.23 | 0.33/0.5/0.17  | 0.45 | 0.42 | 1.23E-04 | rec | 1.45 | 1.2-1.75  |
| rs11748911 | 5 | 89.99  | GPR98     | 812 | 3055 | 0.79/0.2/0.01  | 0.84/0.15/0.01 | 0.11 | 0.08 | 1.76E-04 | dom | 1.45 | 1.19-1.76 |
| rs1428638  | 5 | 118.18 | DTWD2     | 812 | 3044 | 0.82/0.18/0    | 0.87/0.12/0    | 0.09 | 0.07 | 1.63E-04 | dom | 1.49 | 1.21-1.84 |
| rs2548997  | 5 | 131.86 | IRF1      | 813 | 3058 | 0.52/0.39/0.09 | 0.44/0.45/0.11 | 0.29 | 0.33 | 1.82E-04 | dom | 0.74 | 0.64-0.87 |
| rs949637   | 5 | 174.45 |           | 814 | 3055 | 0.76/0.22/0.02 | 0.82/0.17/0.01 | 0.13 | 0.09 | 2.69E-05 | add | 1.44 | 1.21-1.71 |
| rs4700921  | 5 | 179.79 | CNOT6     | 814 | 3058 | 0.32/0.51/0.17 | 0.4/0.46/0.14  | 0.42 | 0.37 | 9.70E-05 | dom | 1.39 | 1.18-1.63 |
| rs17080306 | 5 | 179.79 | CNOT6     | 811 | 3058 | 0.32/0.51/0.17 | 0.4/0.46/0.14  | 0.42 | 0.37 | 1.11E-04 | dom | 1.38 | 1.17-1.63 |
| rs17629918 | 5 | 179.8  | CNOT6     | 812 | 3058 | 0.29/0.52/0.18 | 0.36/0.47/0.16 | 0.44 | 0.40 | 1.78E-04 | dom | 1.38 | 1.17-1.63 |
| rs12191519 | 6 | 52.3   | LOC647163 | 814 | 3057 | 0.31/0.48/0.21 | 0.36/0.47/0.16 | 0.45 | 0.40 | 6.25E-05 | add | 1.25 | 1.12-1.4  |
| rs7772171  | 6 | 106.48 | PRDM1     | 808 | 3047 | 0.52/0.43/0.05 | 0.59/0.35/0.06 | 0.27 | 0.23 | 1.26E-04 | dom | 1.36 | 1.16-1.59 |
| rs633724   | 6 | 106.84 | ATG5      | 814 | 3050 | 0.35/0.48/0.17 | 0.42/0.45/0.13 | 0.41 | 0.35 | 1.19E-04 | add | 1.25 | 1.11-1.39 |
| rs533685   | 6 | 106.93 | ATG5      | 812 | 3035 | 0.81/0.18/0    | 0.87/0.13/0.01 | 0.10 | 0.07 | 1.26E-04 | dom | 1.5  | 1.22-1.84 |
| rs3862834  | 6 | 108.14 | SOBP      | 813 | 3056 | 0.63/0.31/0.06 | 0.54/0.4/0.06  | 0.22 | 0.26 | 1.44E-05 | dom | 0.7  | 0.6-0.82  |
| rs1624055  | 6 | 108.14 | SOBP      | 813 | 3053 | 0.62/0.32/0.06 | 0.54/0.4/0.06  | 0.22 | 0.26 | 8.41E-05 | dom | 0.73 | 0.62-0.85 |
| rs1629910  | 6 | 108.14 | SOBP      | 813 | 3058 | 0.62/0.32/0.06 | 0.54/0.4/0.06  | 0.22 | 0.26 | 1.05E-04 | dom | 0.73 | 0.62-0.86 |
| rs1621495  | 6 | 108.14 | SOBP      | 800 | 3020 | 0.58/0.35/0.07 | 0.5/0.42/0.07  | 0.25 | 0.28 | 1.08E-04 | dom | 0.73 | 0.63-0.86 |
| rs1728123  | 6 | 108.14 | SOBP      | 814 | 3058 | 0.62/0.32/0.06 | 0.54/0.4/0.06  | 0.22 | 0.26 | 1.57E-04 | dom | 0.74 | 0.63-0.86 |
| rs6922304  | 6 | 108.17 | SCML4     | 813 | 3058 | 0.71/0.25/0.04 | 0.64/0.32/0.04 | 0.16 | 0.20 | 1.92E-04 | dom | 0.73 | 0.61-0.86 |

|            |    |        |          |     |      |                |                |      |      |          |     |      |           |
|------------|----|--------|----------|-----|------|----------------|----------------|------|------|----------|-----|------|-----------|
| rs9320231  | 6  | 108.18 | SCML4    | 811 | 3050 | 0.71/0.25/0.04 | 0.64/0.33/0.04 | 0.17 | 0.20 | 1.16E-04 | dom | 0.72 | 0.61-0.85 |
| rs12664414 | 6  | 108.18 | SCML4    | 814 | 3052 | 0.71/0.25/0.04 | 0.64/0.33/0.04 | 0.17 | 0.20 | 1.79E-04 | dom | 0.72 | 0.61-0.86 |
| rs1321270  | 6  | 132.51 | MOXD1    | 813 | 3057 | 0.24/0.49/0.26 | 0.3/0.49/0.21  | 0.51 | 0.46 | 1.37E-04 | add | 1.24 | 1.11-1.38 |
| rs2614264  | 6  | 135.75 | AHI1     | 813 | 3050 | 0.25/0.52/0.23 | 0.32/0.49/0.19 | 0.49 | 0.44 | 1.54E-04 | add | 1.24 | 1.11-1.38 |
| rs6463967  | 7  | 10.09  |          | 813 | 3058 | 0.56/0.39/0.05 | 0.63/0.32/0.04 | 0.25 | 0.21 | 1.89E-04 | dom | 1.35 | 1.15-1.58 |
| rs17143897 | 7  | 21.13  |          | 807 | 3038 | 0.63/0.3/0.06  | 0.68/0.29/0.03 | 0.21 | 0.17 | 1.63E-04 | add | 1.3  | 1.13-1.49 |
| rs3173734  | 7  | 32.59  | AVL9     | 812 | 3050 | 0.56/0.34/0.09 | 0.55/0.39/0.06 | 0.27 | 0.25 | 9.71E-05 | rec | 1.75 | 1.32-2.31 |
| rs2621208  | 7  | 93.88  | COL1A2   | 814 | 3054 | 0.59/0.34/0.07 | 0.64/0.33/0.03 | 0.24 | 0.19 | 1.06E-04 | add | 1.3  | 1.14-1.48 |
| rs4729451  | 7  | 97.96  | BAIAP2L1 | 814 | 3056 | 0.81/0.18/0.01 | 0.87/0.13/0    | 0.10 | 0.07 | 3.56E-05 | add | 1.5  | 1.24-1.81 |
| rs390547   | 7  | 107.51 | LAMB4    | 813 | 3048 | 0.21/0.51/0.29 | 0.27/0.49/0.23 | 0.54 | 0.48 | 3.05E-05 | add | 1.26 | 1.13-1.41 |
| rs1550950  | 8  | 0.32   | FBXO25   | 813 | 3058 | 0.8/0.19/0.01  | 0.74/0.24/0.02 | 0.10 | 0.14 | 1.73E-04 | add | 0.72 | 0.6-0.85  |
| rs1550948  | 8  | 0.33   | FBXO25   | 813 | 3058 | 0.75/0.23/0.02 | 0.68/0.29/0.03 | 0.14 | 0.18 | 1.71E-04 | dom | 0.71 | 0.6-0.85  |
| rs4871834  | 8  | 22.71  | PEBP4    | 810 | 3055 | 0.41/0.45/0.14 | 0.34/0.48/0.18 | 0.37 | 0.42 | 6.33E-05 | add | 0.8  | 0.71-0.89 |
| rs7836768  | 8  | 65.55  | MIR124-2 | 814 | 3058 | 0.35/0.49/0.16 | 0.43/0.45/0.13 | 0.40 | 0.35 | 1.51E-04 | add | 1.24 | 1.11-1.39 |
| rs381349   | 8  | 81.61  | ZBTB10   | 812 | 3049 | 0.86/0.14/0.01 | 0.79/0.2/0.01  | 0.08 | 0.11 | 2.87E-05 | dom | 0.63 | 0.51-0.78 |
| rs1788148  | 8  | 100.83 | VPS13B   | 812 | 3056 | 0.73/0.25/0.02 | 0.79/0.2/0.01  | 0.14 | 0.11 | 1.86E-04 | dom | 1.4  | 1.17-1.68 |
| rs678839   | 8  | 103.98 | AZIN1    | 808 | 2990 | 0.58/0.37/0.05 | 0.51/0.41/0.08 | 0.24 | 0.28 | 1.64E-04 | add | 0.78 | 0.69-0.89 |
| rs1532560  | 8  | 129.12 | MIR1207  | 814 | 3058 | 0.65/0.3/0.05  | 0.56/0.37/0.07 | 0.20 | 0.25 | 1.67E-05 | dom | 0.7  | 0.6-0.82  |
| rs12002949 | 9  | 1.46   |          | 806 | 3030 | 0.9/0.09/0     | 0.83/0.16/0.01 | 0.05 | 0.09 | 5.98E-07 | dom | 0.53 | 0.41-0.68 |
| rs1536689  | 9  | 16.12  |          | 814 | 3055 | 0.56/0.38/0.07 | 0.63/0.33/0.05 | 0.25 | 0.21 | 1.87E-04 | add | 1.28 | 1.12-1.45 |
| rs10814234 | 9  | 35.4   | UNC13B   | 814 | 3058 | 0.73/0.25/0.01 | 0.79/0.2/0.01  | 0.14 | 0.11 | 1.64E-04 | dom | 1.41 | 1.18-1.69 |
| rs10735544 | 9  | 82.16  |          | 812 | 3058 | 0.27/0.47/0.25 | 0.31/0.5/0.19  | 0.49 | 0.44 | 1.40E-04 | add | 1.24 | 1.11-1.38 |
| rs12686543 | 9  | 82.17  |          | 814 | 3051 | 0.54/0.39/0.07 | 0.62/0.34/0.04 | 0.26 | 0.21 | 2.52E-05 | add | 1.31 | 1.16-1.49 |
| rs7851576  | 9  | 82.17  |          | 810 | 3056 | 0.35/0.47/0.18 | 0.28/0.51/0.21 | 0.41 | 0.46 | 1.89E-04 | dom | 0.73 | 0.62-0.86 |
| rs4877557  | 9  | 82.18  |          | 812 | 3050 | 0.33/0.46/0.21 | 0.38/0.48/0.14 | 0.44 | 0.38 | 1.95E-05 | add | 1.28 | 1.14-1.43 |
| rs11250787 | 10 | 1.82   | ADARB2   | 814 | 3058 | 0.26/0.55/0.19 | 0.33/0.49/0.18 | 0.47 | 0.43 | 1.93E-04 | dom | 1.39 | 1.17-1.66 |
| rs4367871  | 10 | 1.84   | ADARB2   | 814 | 3057 | 0.27/0.55/0.18 | 0.35/0.48/0.17 | 0.45 | 0.41 | 7.00E-05 | dom | 1.42 | 1.19-1.68 |
| rs10795791 | 10 | 6.15   | IL2RA    | 814 | 3058 | 0.29/0.5/0.21  | 0.35/0.48/0.17 | 0.46 | 0.41 | 1.60E-04 | add | 1.24 | 1.11-1.38 |
| rs1999241  | 10 | 26.61  | GAD2     | 808 | 3055 | 0.44/0.47/0.09 | 0.52/0.4/0.09  | 0.32 | 0.28 | 1.68E-04 | dom | 1.35 | 1.15-1.58 |
| rs16917442 | 10 | 63.98  | ZNF365   | 801 | 3034 | 0.61/0.32/0.07 | 0.53/0.38/0.08 | 0.23 | 0.27 | 1.34E-04 | dom | 0.73 | 0.63-0.86 |
| rs12416113 | 10 | 64.57  | NRBF2    | 812 | 3051 | 0.66/0.32/0.03 | 0.75/0.23/0.02 | 0.19 | 0.14 | 2.39E-07 | dom | 1.55 | 1.31-1.83 |

|            |    |        |              |     |      |                |                |      |      |          |     |      |           |
|------------|----|--------|--------------|-----|------|----------------|----------------|------|------|----------|-----|------|-----------|
| rs11817689 | 10 | 64.59  | JMJD1C       | 814 | 3055 | 0.65/0.32/0.03 | 0.75/0.23/0.02 | 0.19 | 0.14 | 9.77E-08 | dom | 1.57 | 1.33-1.86 |
| rs1009984  | 10 | 64.59  | NRBF2        | 814 | 3058 | 0.64/0.32/0.04 | 0.73/0.25/0.02 | 0.20 | 0.15 | 2.60E-06 | dom | 1.48 | 1.26-1.75 |
| rs7082090  | 10 | 64.67  | JMJD1C       | 813 | 3058 | 0.66/0.31/0.03 | 0.75/0.23/0.02 | 0.19 | 0.14 | 2.20E-07 | dom | 1.55 | 1.32-1.84 |
| rs9414780  | 10 | 64.67  | JMJD1C       | 809 | 3053 | 0.66/0.31/0.03 | 0.75/0.23/0.02 | 0.18 | 0.14 | 5.95E-07 | dom | 1.53 | 1.3-1.81  |
| rs9414788  | 10 | 64.73  | JMJD1C       | 813 | 3042 | 0.66/0.31/0.03 | 0.75/0.23/0.02 | 0.19 | 0.14 | 2.48E-07 | dom | 1.55 | 1.31-1.83 |
| rs10761745 | 10 | 64.77  | JMJD1C       | 813 | 3058 | 0.66/0.31/0.03 | 0.75/0.23/0.02 | 0.19 | 0.14 | 2.23E-07 | dom | 1.55 | 1.32-1.84 |
| rs10761744 | 10 | 64.77  | JMJD1C       | 814 | 3057 | 0.66/0.31/0.03 | 0.75/0.23/0.02 | 0.18 | 0.14 | 2.56E-07 | dom | 1.55 | 1.31-1.83 |
| rs9415699  | 10 | 64.81  | JMJD1C       | 814 | 3058 | 0.66/0.31/0.03 | 0.75/0.23/0.02 | 0.19 | 0.14 | 1.72E-07 | dom | 1.56 | 1.32-1.84 |
| rs9415705  | 10 | 64.83  | JMJD1C       | 814 | 3056 | 0.66/0.31/0.03 | 0.75/0.23/0.02 | 0.19 | 0.14 | 1.84E-07 | dom | 1.56 | 1.32-1.84 |
| rs2893922  | 10 | 64.92  | LOC100128604 | 814 | 3056 | 0.66/0.31/0.03 | 0.75/0.23/0.02 | 0.19 | 0.14 | 3.19E-07 | dom | 1.54 | 1.31-1.82 |
| rs10761781 | 10 | 64.95  | REEP3        | 814 | 3056 | 0.6/0.35/0.05  | 0.68/0.29/0.03 | 0.22 | 0.18 | 3.95E-05 | dom | 1.4  | 1.19-1.64 |
| rs16918575 | 10 | 64.97  | REEP3        | 809 | 3056 | 0.66/0.32/0.02 | 0.76/0.22/0.02 | 0.18 | 0.13 | 1.67E-07 | dom | 1.57 | 1.32-1.85 |
| rs4746201  | 10 | 64.99  | REEP3        | 814 | 3058 | 0.68/0.3/0.02  | 0.77/0.21/0.02 | 0.17 | 0.13 | 1.01E-07 | dom | 1.58 | 1.34-1.88 |
| rs1426619  | 10 | 90.08  | C10orf59     | 814 | 3058 | 0.39/0.45/0.16 | 0.32/0.49/0.19 | 0.38 | 0.44 | 5.78E-05 | dom | 0.72 | 0.61-0.84 |
| rs10882303 | 10 | 95.44  | C10orf4      | 782 | 2954 | 0.73/0.25/0.01 | 0.8/0.19/0.01  | 0.14 | 0.10 | 1.08E-05 | add | 1.47 | 1.24-1.75 |
| rs11188409 | 10 | 97.38  | ALDH18A1     | 811 | 3057 | 0.66/0.32/0.03 | 0.59/0.36/0.05 | 0.19 | 0.23 | 1.42E-04 | add | 0.76 | 0.66-0.88 |
| rs4453231  | 11 | 11.36  | GALNTL4      | 814 | 3057 | 0.49/0.42/0.09 | 0.43/0.45/0.12 | 0.30 | 0.35 | 1.72E-04 | add | 0.8  | 0.71-0.9  |
| rs10832890 | 11 | 18.13  | MRGPRX3      | 813 | 3057 | 0.57/0.37/0.07 | 0.49/0.43/0.08 | 0.25 | 0.30 | 7.52E-05 | dom | 0.73 | 0.62-0.85 |
| rs2863140  | 11 | 44.98  | LOC221122    | 814 | 3058 | 0.3/0.51/0.19  | 0.25/0.51/0.24 | 0.44 | 0.50 | 1.70E-04 | add | 0.81 | 0.72-0.9  |
| rs12283172 | 11 | 46.4   | AMBRA1       | 806 | 3051 | 0.74/0.24/0.02 | 0.67/0.3/0.03  | 0.14 | 0.18 | 1.75E-04 | dom | 0.72 | 0.6-0.85  |
| rs6489438  | 12 | 3.1    | TSPAN9       | 812 | 3057 | 0.53/0.39/0.08 | 0.59/0.36/0.05 | 0.27 | 0.23 | 1.14E-04 | add | 1.28 | 1.13-1.45 |
| rs11047723 | 12 | 24.99  | BCAT1        | 804 | 3043 | 0.55/0.37/0.08 | 0.47/0.45/0.08 | 0.27 | 0.31 | 1.06E-04 | dom | 0.73 | 0.63-0.86 |
| rs10880908 | 12 | 44.77  | SFRS2IP      | 814 | 3058 | 0.3/0.53/0.17  | 0.27/0.5/0.23  | 0.44 | 0.48 | 1.28E-04 | rec | 0.67 | 0.55-0.83 |
| rs872969   | 12 | 91.17  | BTG1         | 809 | 3056 | 0.46/0.43/0.11 | 0.53/0.41/0.07 | 0.32 | 0.27 | 5.10E-05 | add | 1.28 | 1.14-1.45 |
| rs11059562 | 12 | 127.23 |              | 813 | 3058 | 0.56/0.39/0.05 | 0.64/0.32/0.04 | 0.24 | 0.20 | 2.28E-05 | dom | 1.4  | 1.2-1.64  |
| rs4941939  | 13 | 39.15  | COG6         | 813 | 3058 | 0.34/0.46/0.2  | 0.38/0.49/0.13 | 0.43 | 0.38 | 1.69E-04 | add | 1.24 | 1.11-1.39 |
| rs17061417 | 13 | 61.96  |              | 811 | 3023 | 0.83/0.15/0.02 | 0.81/0.18/0.01 | 0.10 | 0.10 | 2.37E-05 | rec | 4.33 | 2.19-8.53 |
| rs17063408 | 13 | 74.18  |              | 814 | 3057 | 0.57/0.39/0.04 | 0.65/0.3/0.04  | 0.24 | 0.20 | 7.55E-06 | dom | 1.43 | 1.22-1.68 |
| rs17102539 | 14 | 20.74  | HNRNPC       | 813 | 3058 | 0.76/0.23/0.01 | 0.82/0.17/0.01 | 0.12 | 0.09 | 6.02E-05 | dom | 1.46 | 1.22-1.76 |
| rs8020810  | 14 | 24.64  | STXBP6       | 814 | 3058 | 0.75/0.22/0.02 | 0.69/0.29/0.03 | 0.14 | 0.17 | 1.63E-04 | dom | 0.71 | 0.6-0.85  |
| rs7359140  | 14 | 75     | JDP2         | 814 | 3057 | 0.32/0.45/0.23 | 0.33/0.49/0.17 | 0.46 | 0.42 | 1.06E-04 | rec | 1.45 | 1.2-1.75  |

|            |    |       |           |     |      |                |                |      |      |          |     |      |           |
|------------|----|-------|-----------|-----|------|----------------|----------------|------|------|----------|-----|------|-----------|
| rs7359152  | 14 | 75    | JDP2      | 813 | 3047 | 0.31/0.45/0.23 | 0.33/0.5/0.17  | 0.46 | 0.42 | 1.32E-04 | rec | 1.44 | 1.2-1.74  |
| rs8043332  | 15 | 96.89 | FAM169B   | 813 | 3058 | 0.44/0.44/0.13 | 0.49/0.43/0.08 | 0.34 | 0.29 | 1.30E-04 | add | 1.26 | 1.12-1.42 |
| rs11074618 | 16 | 24.29 | CACNG3    | 814 | 3056 | 0.36/0.5/0.15  | 0.31/0.48/0.21 | 0.40 | 0.45 | 1.03E-04 | add | 0.8  | 0.72-0.9  |
| rs9936233  | 16 | 24.29 | CACNG3    | 814 | 3058 | 0.78/0.21/0.01 | 0.71/0.26/0.02 | 0.12 | 0.15 | 1.35E-04 | add | 0.72 | 0.61-0.85 |
| rs9930106  | 16 | 51.56 | CHD9      | 811 | 3054 | 0.53/0.4/0.07  | 0.61/0.34/0.06 | 0.27 | 0.22 | 6.77E-05 | dom | 1.37 | 1.17-1.61 |
| rs2432414  | 16 | 79.45 | CDYL2     | 811 | 3058 | 0.25/0.46/0.28 | 0.27/0.51/0.22 | 0.52 | 0.48 | 1.64E-04 | rec | 1.4  | 1.18-1.67 |
| rs4790365  | 17 | 2.66  | GARNL4    | 813 | 3058 | 0.62/0.32/0.06 | 0.68/0.29/0.03 | 0.22 | 0.18 | 1.17E-04 | add | 1.3  | 1.14-1.49 |
| rs11653603 | 17 | 10.21 | MYH13     | 808 | 3051 | 0.52/0.41/0.07 | 0.61/0.34/0.05 | 0.27 | 0.22 | 2.12E-05 | dom | 1.4  | 1.2-1.64  |
| rs12950258 | 17 | 10.21 | MYH13     | 809 | 3057 | 0.53/0.4/0.07  | 0.61/0.34/0.05 | 0.27 | 0.22 | 5.93E-05 | dom | 1.38 | 1.18-1.61 |
| rs11658620 | 17 | 10.21 | MYH13     | 809 | 3047 | 0.53/0.4/0.07  | 0.6/0.34/0.05  | 0.27 | 0.23 | 7.80E-05 | dom | 1.37 | 1.17-1.6  |
| rs12951092 | 17 | 10.21 | MYH13     | 814 | 3058 | 0.54/0.39/0.07 | 0.61/0.34/0.05 | 0.27 | 0.22 | 9.42E-05 | dom | 1.36 | 1.17-1.59 |
| rs10521213 | 17 | 13.11 |           | 813 | 3057 | 0.62/0.34/0.04 | 0.56/0.38/0.07 | 0.21 | 0.26 | 7.23E-05 | add | 0.76 | 0.67-0.87 |
| rs230922   | 17 | 15.06 | PMP22     | 812 | 3043 | 0.48/0.41/0.11 | 0.54/0.39/0.07 | 0.32 | 0.27 | 2.08E-05 | add | 1.3  | 1.15-1.46 |
| rs230915   | 17 | 15.15 | PMP22     | 810 | 3057 | 0.3/0.49/0.21  | 0.36/0.48/0.16 | 0.45 | 0.40 | 1.19E-04 | add | 1.24 | 1.11-1.39 |
| rs9901734  | 17 | 23.11 | NOS2      | 814 | 3058 | 0.64/0.33/0.03 | 0.57/0.37/0.06 | 0.20 | 0.24 | 1.23E-04 | add | 0.77 | 0.67-0.88 |
| rs2526354  | 17 | 55.33 | RPS6KB1   | 802 | 3029 | 0.61/0.35/0.04 | 0.68/0.29/0.03 | 0.22 | 0.18 | 1.01E-04 | add | 1.31 | 1.14-1.5  |
| rs11659412 | 18 | 7.05  | LAMA1     | 811 | 3050 | 0.29/0.56/0.15 | 0.38/0.48/0.14 | 0.43 | 0.38 | 4.46E-06 | dom | 1.48 | 1.25-1.76 |
| rs2542151  | 18 | 12.77 | PTPN2     | 811 | 3020 | 0.62/0.33/0.05 | 0.7/0.28/0.02  | 0.21 | 0.16 | 2.50E-07 | add | 1.45 | 1.26-1.67 |
| rs2542160  | 18 | 12.78 | PTPN2     | 814 | 3058 | 0.47/0.43/0.1  | 0.41/0.46/0.13 | 0.31 | 0.36 | 1.79E-04 | add | 0.8  | 0.71-0.9  |
| rs2847297  | 18 | 12.79 | PTPN2     | 814 | 3058 | 0.37/0.46/0.17 | 0.44/0.44/0.12 | 0.40 | 0.34 | 3.06E-06 | add | 1.31 | 1.17-1.46 |
| rs16939895 | 18 | 12.81 | PTPN2     | 814 | 3058 | 0.62/0.32/0.06 | 0.7/0.27/0.03  | 0.22 | 0.16 | 5.52E-08 | add | 1.45 | 1.27-1.66 |
| rs2847281  | 18 | 12.81 | PTPN2     | 811 | 3048 | 0.44/0.44/0.12 | 0.36/0.48/0.17 | 0.34 | 0.40 | 4.20E-06 | add | 0.76 | 0.68-0.86 |
| rs8087237  | 18 | 12.82 | PTPN2     | 808 | 3008 | 0.37/0.45/0.17 | 0.29/0.5/0.21  | 0.40 | 0.46 | 2.24E-06 | dom | 0.67 | 0.57-0.79 |
| rs7234029  | 18 | 12.87 | PTPN2     | 814 | 3058 | 0.61/0.33/0.06 | 0.7/0.27/0.03  | 0.22 | 0.16 | 1.65E-08 | add | 1.47 | 1.29-1.68 |
| rs12968853 | 18 | 40.16 |           | 814 | 3058 | 0.61/0.36/0.04 | 0.54/0.39/0.07 | 0.22 | 0.26 | 8.71E-05 | add | 0.77 | 0.67-0.88 |
| rs12970803 | 18 | 45.45 | LIPG      | 814 | 3058 | 0.63/0.32/0.05 | 0.56/0.39/0.06 | 0.21 | 0.25 | 1.33E-04 | dom | 0.73 | 0.62-0.86 |
| rs6507952  | 18 | 45.53 | ACAA2     | 814 | 3058 | 0.51/0.38/0.11 | 0.57/0.37/0.06 | 0.30 | 0.25 | 4.29E-05 | add | 1.29 | 1.14-1.45 |
| rs7241641  | 18 | 45.53 | LIPG      | 813 | 3052 | 0.52/0.38/0.11 | 0.57/0.37/0.06 | 0.30 | 0.25 | 8.66E-05 | add | 1.27 | 1.13-1.44 |
| rs7237886  | 18 | 71.94 |           | 813 | 3058 | 0.29/0.54/0.17 | 0.36/0.49/0.15 | 0.44 | 0.40 | 1.65E-04 | dom | 1.38 | 1.17-1.64 |
| rs4267414  | 18 | 72.35 | LOC284276 | 809 | 3049 | 0.47/0.44/0.08 | 0.55/0.37/0.08 | 0.30 | 0.26 | 1.08E-04 | dom | 1.36 | 1.16-1.59 |
| rs2230611  | 19 | 5.16  | PTPRS     | 814 | 3058 | 0.75/0.23/0.02 | 0.81/0.18/0.01 | 0.14 | 0.10 | 1.26E-04 | add | 1.38 | 1.17-1.63 |

|            |    |       |          |     |      |                |                |      |      |          |     |      |           |
|------------|----|-------|----------|-----|------|----------------|----------------|------|------|----------|-----|------|-----------|
| rs10419891 | 19 | 58.28 | ZNF160   | 811 | 3055 | 0.2/0.56/0.24  | 0.27/0.5/0.23  | 0.52 | 0.48 | 1.07E-04 | dom | 1.45 | 1.2-1.75  |
| rs7255074  | 19 | 58.51 | BIRC8    | 814 | 3058 | 0.32/0.53/0.15 | 0.29/0.49/0.22 | 0.42 | 0.46 | 5.31E-05 | rec | 0.65 | 0.53-0.8  |
| rs652325   | 20 | 10.42 | C20orf94 | 811 | 3052 | 0.6/0.37/0.03  | 0.55/0.38/0.08 | 0.22 | 0.27 | 1.62E-04 | add | 0.78 | 0.68-0.89 |
| rs622293   | 20 | 10.42 | C20orf94 | 813 | 3058 | 0.59/0.37/0.03 | 0.54/0.38/0.08 | 0.22 | 0.27 | 1.78E-04 | add | 0.78 | 0.68-0.89 |
| rs6058022  | 20 | 29.57 | HM13     | 814 | 3058 | 0.75/0.22/0.02 | 0.68/0.29/0.03 | 0.14 | 0.17 | 1.18E-04 | dom | 0.71 | 0.59-0.84 |
| rs6059980  | 20 | 29.61 | HM13     | 814 | 3057 | 0.75/0.22/0.02 | 0.68/0.29/0.03 | 0.14 | 0.17 | 1.74E-04 | dom | 0.71 | 0.6-0.85  |
| rs6120719  | 20 | 29.62 | HM13     | 813 | 3048 | 0.75/0.22/0.02 | 0.68/0.29/0.03 | 0.14 | 0.17 | 5.28E-05 | dom | 0.69 | 0.58-0.83 |
| rs11906851 | 20 | 29.62 | HM13     | 813 | 3058 | 0.75/0.22/0.02 | 0.68/0.29/0.03 | 0.14 | 0.17 | 1.24E-04 | dom | 0.71 | 0.59-0.84 |
| rs6126970  | 20 | 51.85 | SUMO1P1  | 811 | 3049 | 0.34/0.47/0.18 | 0.4/0.47/0.13  | 0.42 | 0.37 | 1.12E-04 | add | 1.25 | 1.11-1.39 |
| rs6025837  | 20 | 55.86 | PMEPA1   | 792 | 2933 | 0.66/0.32/0.02 | 0.74/0.25/0.02 | 0.18 | 0.14 | 6.26E-05 | dom | 1.41 | 1.19-1.67 |
| rs2834890  | 21 | 35.6  |          | 809 | 3034 | 0.51/0.42/0.07 | 0.45/0.44/0.1  | 0.28 | 0.33 | 1.92E-04 | add | 0.79 | 0.7-0.9   |
| rs2837193  | 21 | 40.06 | IGSF5    | 807 | 3027 | 0.31/0.54/0.15 | 0.38/0.47/0.15 | 0.42 | 0.38 | 1.41E-04 | dom | 1.38 | 1.17-1.63 |
| rs462782   | 21 | 40.11 | IGSF5    | 814 | 3058 | 0.31/0.54/0.15 | 0.38/0.47/0.14 | 0.42 | 0.38 | 6.84E-05 | dom | 1.4  | 1.19-1.65 |
| rs458297   | 21 | 40.11 | IGSF5    | 814 | 3058 | 0.31/0.54/0.15 | 0.38/0.47/0.15 | 0.42 | 0.38 | 9.62E-05 | dom | 1.39 | 1.18-1.64 |
| rs380673   | 21 | 40.15 | PCP4     | 813 | 3057 | 0.44/0.46/0.09 | 0.52/0.41/0.08 | 0.33 | 0.28 | 1.91E-04 | dom | 1.35 | 1.15-1.57 |
| rs1534884  | 22 | 27.1  | TTC28    | 813 | 3053 | 0.72/0.26/0.02 | 0.79/0.2/0.02  | 0.15 | 0.11 | 7.45E-05 | dom | 1.43 | 1.2-1.71  |
| rs6005975  | 22 | 27.78 | C22orf31 | 813 | 3056 | 0.27/0.54/0.19 | 0.26/0.48/0.26 | 0.46 | 0.50 | 1.26E-04 | rec | 0.69 | 0.57-0.83 |
| rs5999854  | 22 | 34.24 | RASD2    | 810 | 3057 | 0.29/0.46/0.26 | 0.31/0.5/0.19  | 0.48 | 0.44 | 2.97E-05 | rec | 1.47 | 1.23-1.77 |
